# Supplementary material
Source: PubMed Central journal article supplement (PMC1959392)
Supplement: pgen.0030138.sg001.pdf [file pgen.0030138.sg001.pdf]

# Purine Metabolism in *Ralstonia solanacearum*

- 🔴 Enzyme absent from *Minibacterium massiliensis*
- 🟢 Enzyme present in *Minibacterium massiliensis*

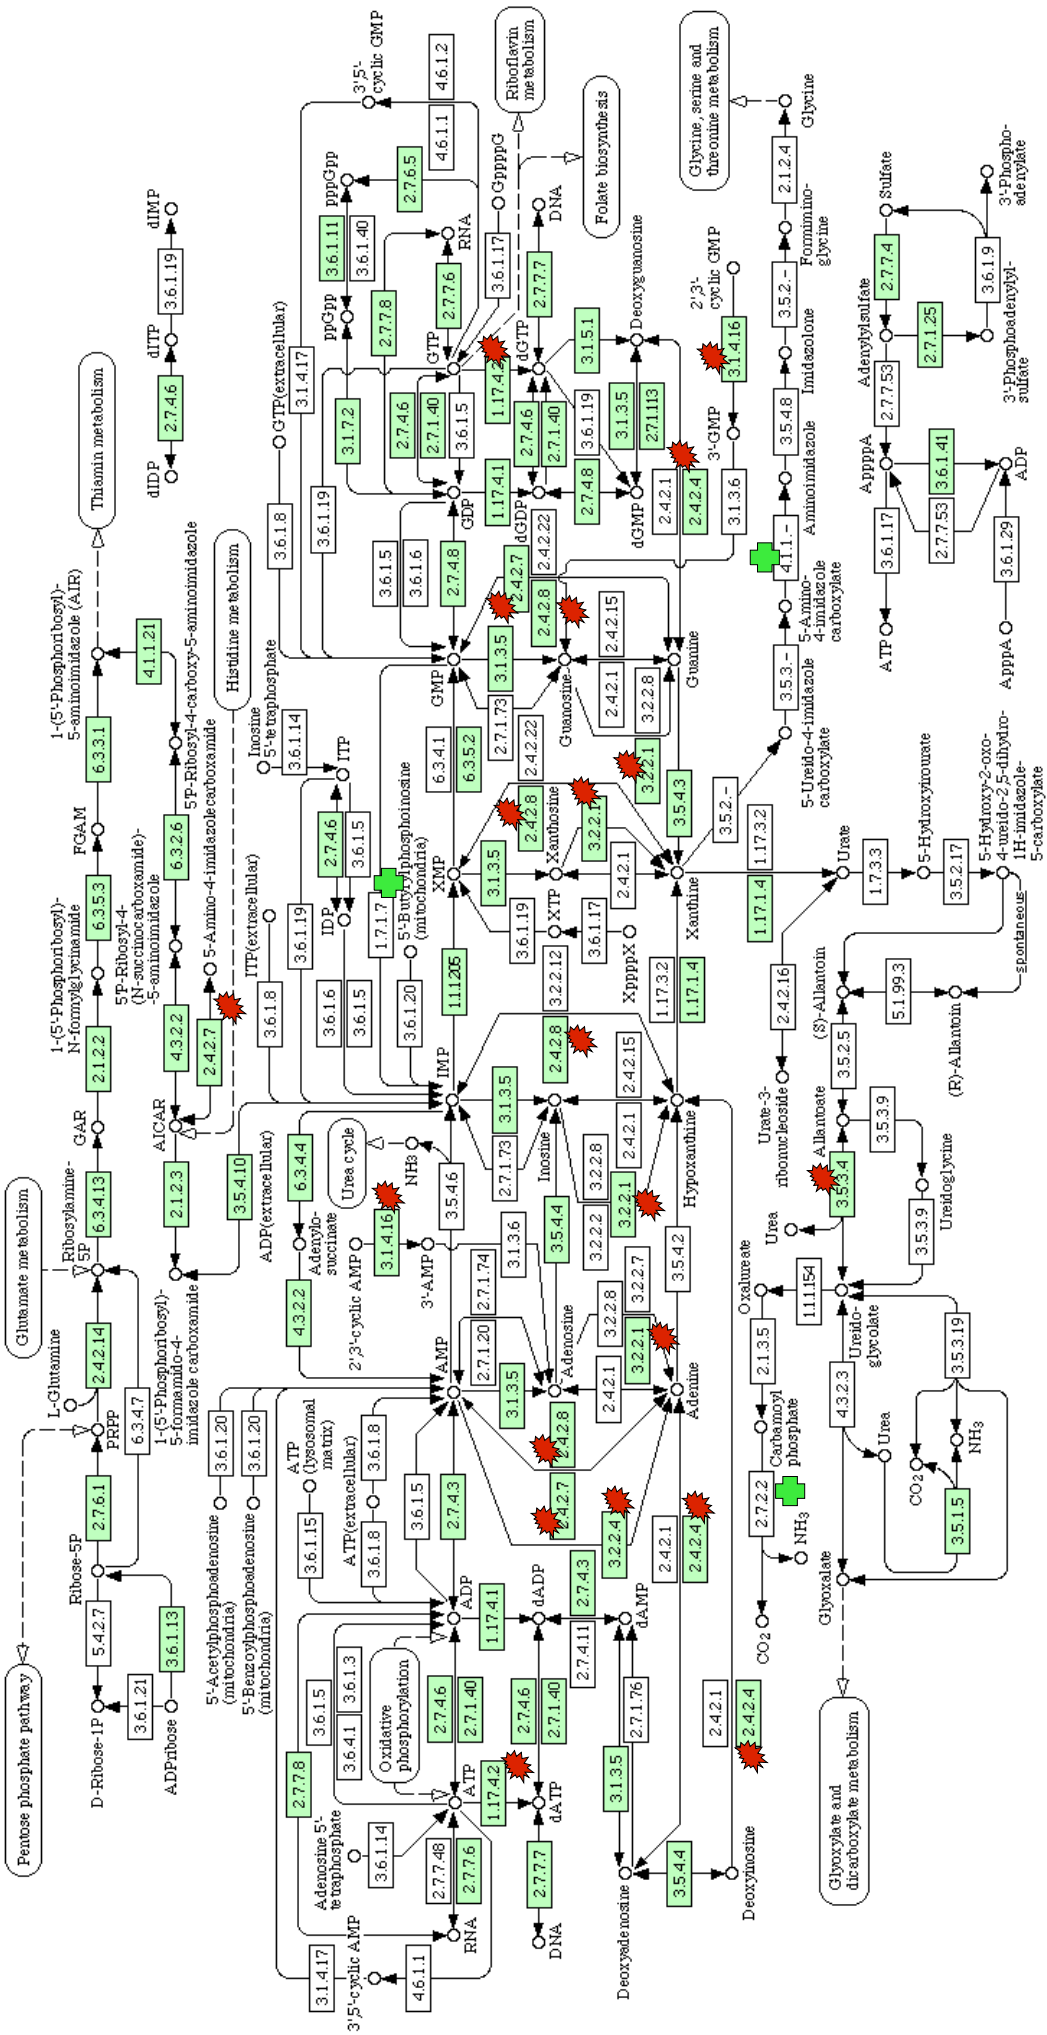

Figure S1
