# Supplementary material
Source: PubMed Central journal article supplement (PMC1959392)
Supplement: pgen.0030138.sg002.pdf [file pgen.0030138.sg002.pdf]

# Cog D tree (Cell division and chromosome partitioning)

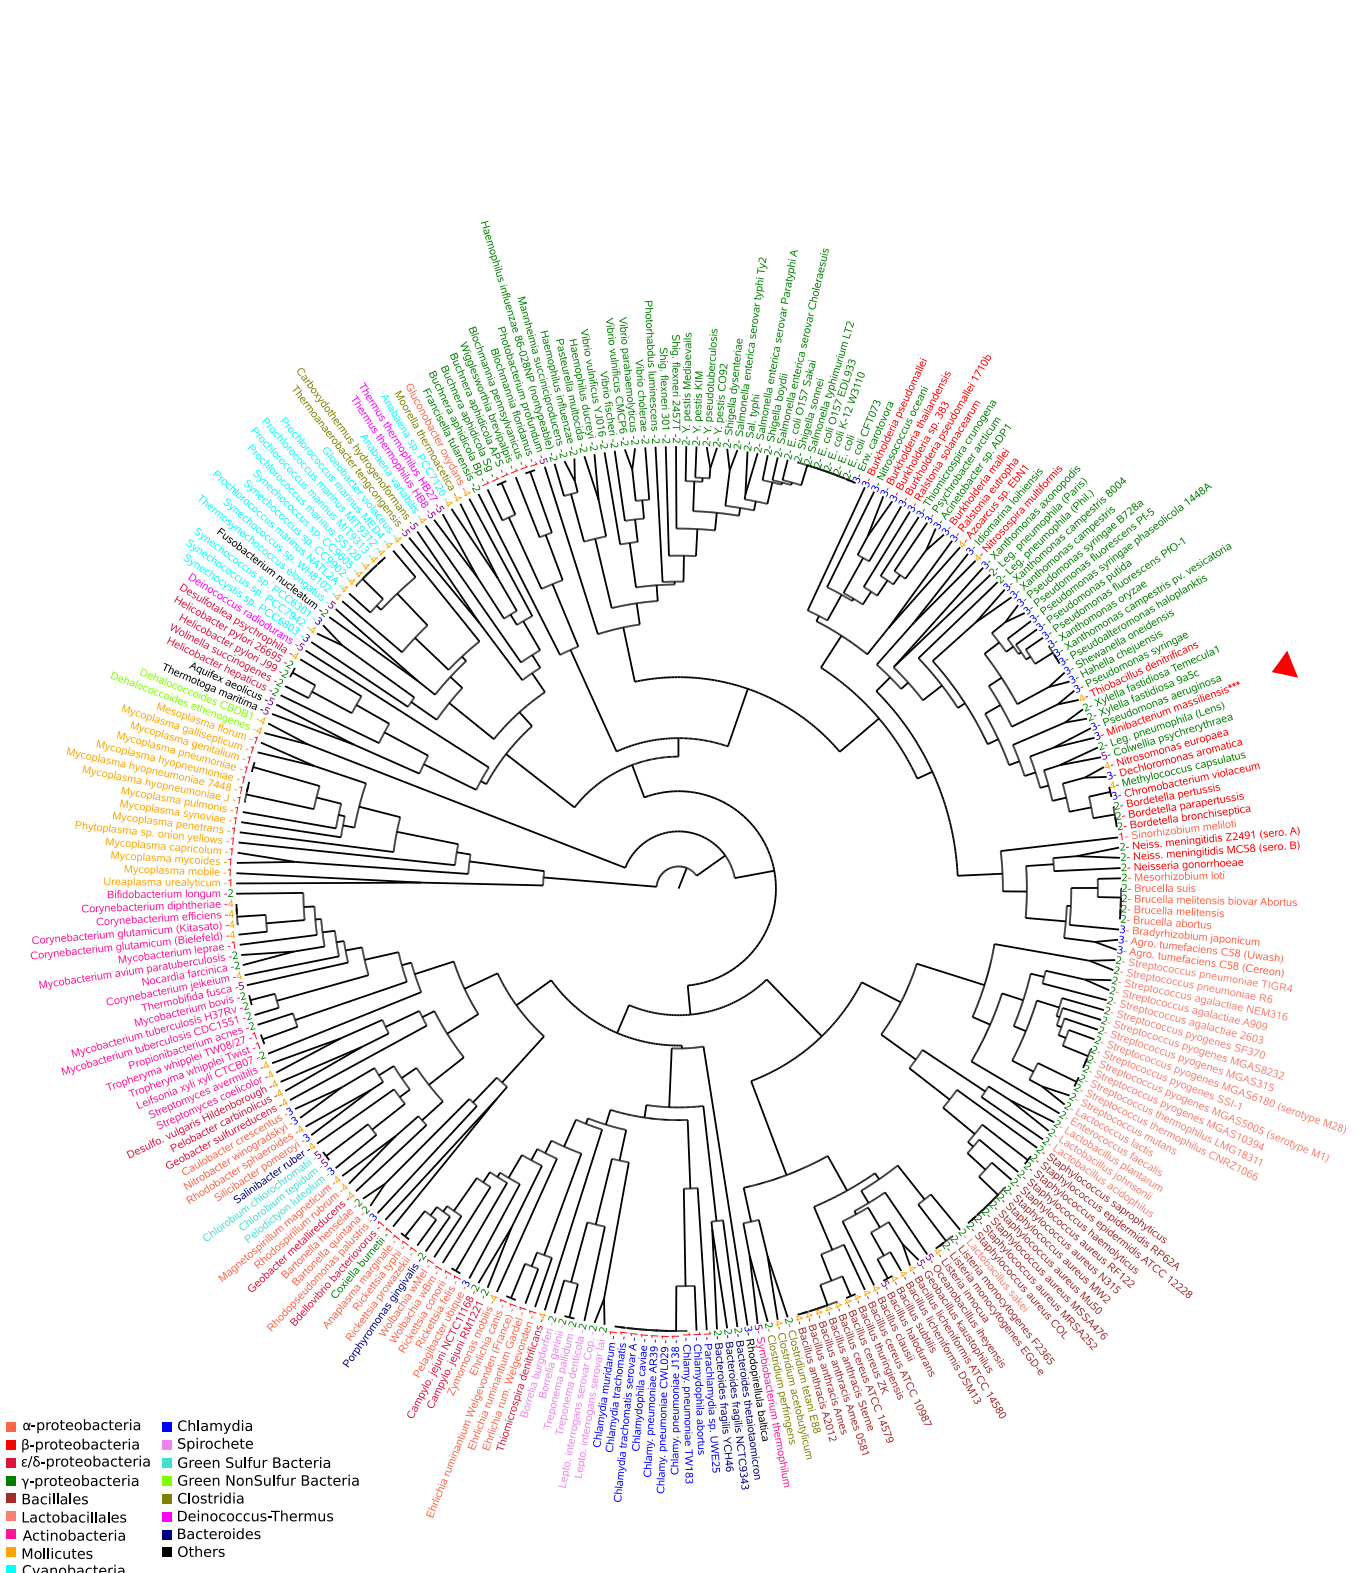

Figure S2:2/3

# Cog I tree (Lipid metabolism)

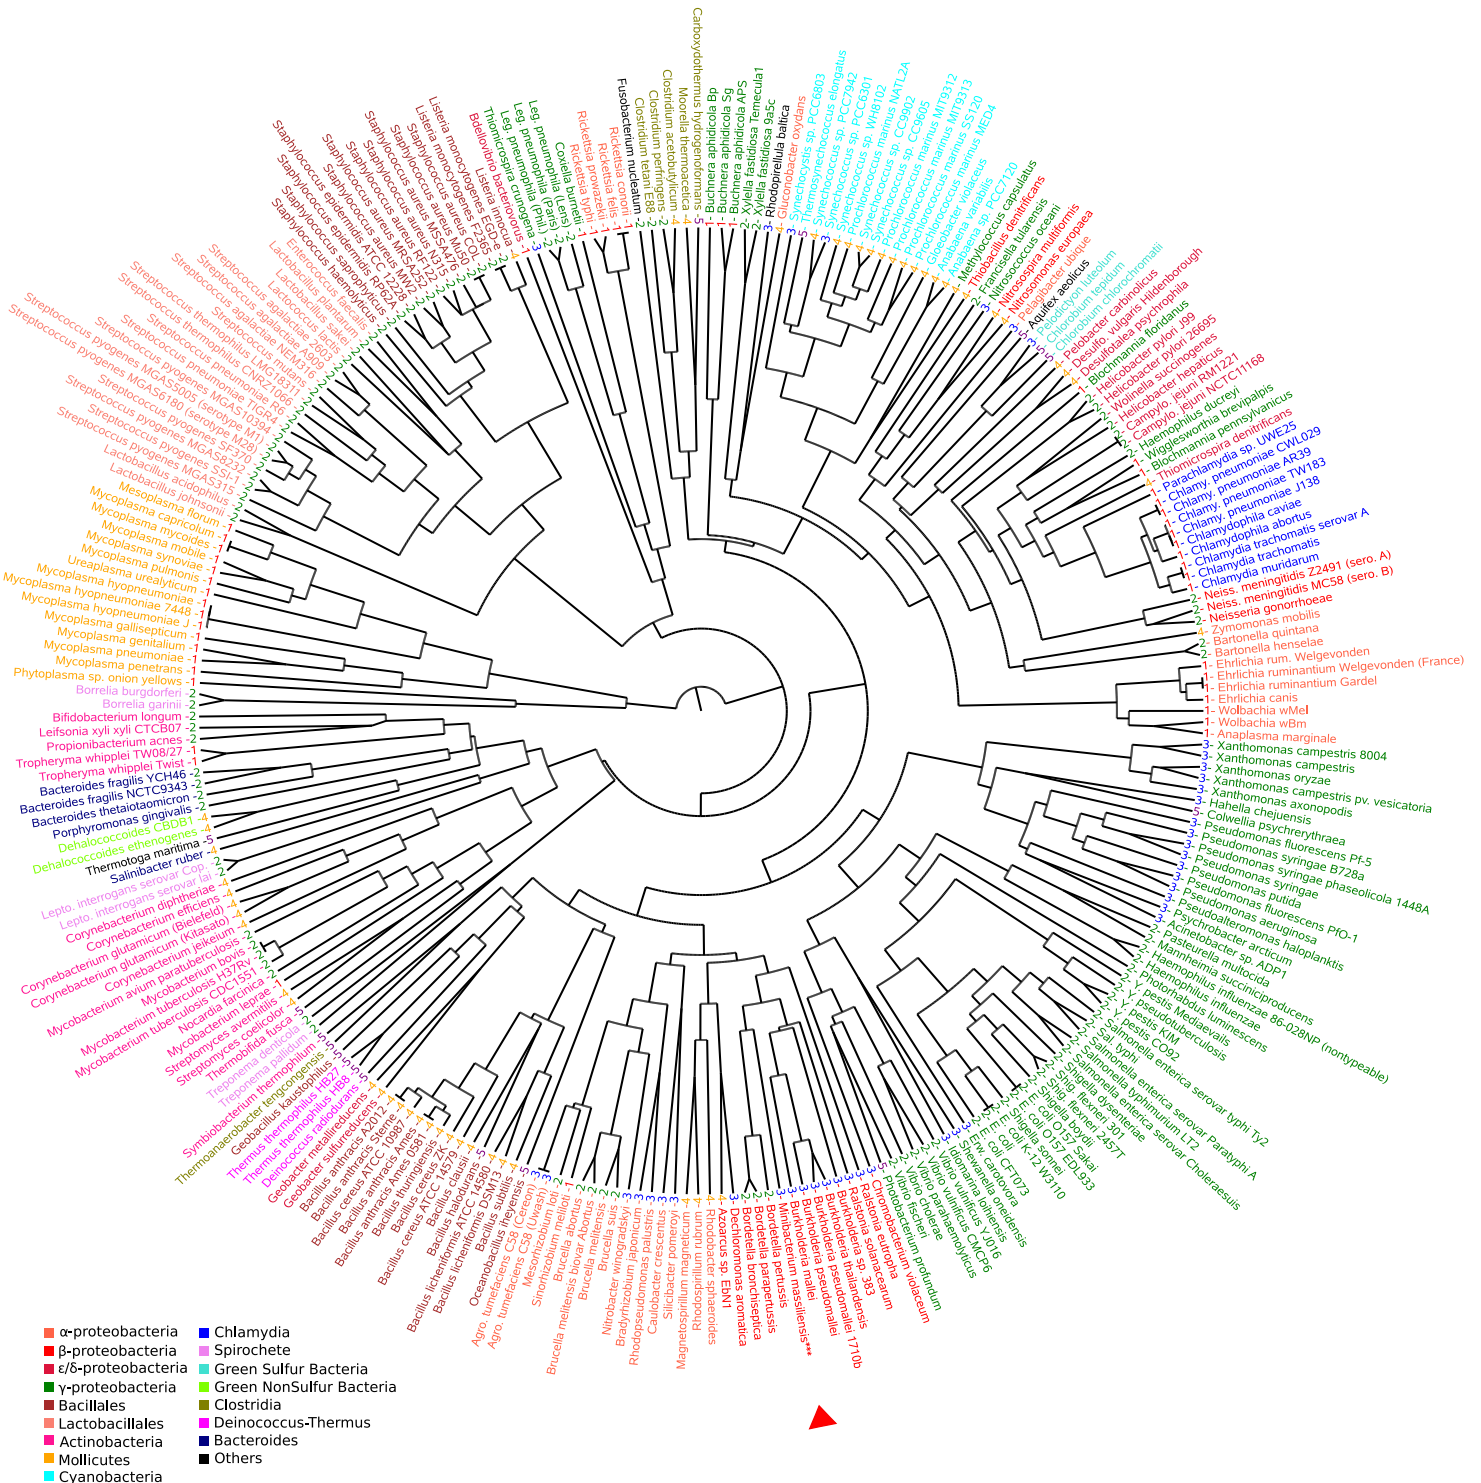

Figure S2:3/3
